# Supplementary figures and images for: Colchicine prophylaxis is associated with fewer gout flares after COVID-19 vaccination
Source: PubMed Central journal article supplement — Ann Rheum Dis. 2022 Mar 11;81(8):1189–93. doi: 10.1136/annrheumdis-2022-222199 (PMC9279754; doi:10.1136/annrheumdis-2022-222199), 2022-03-11

Supplementary Figure 1. Study profile.

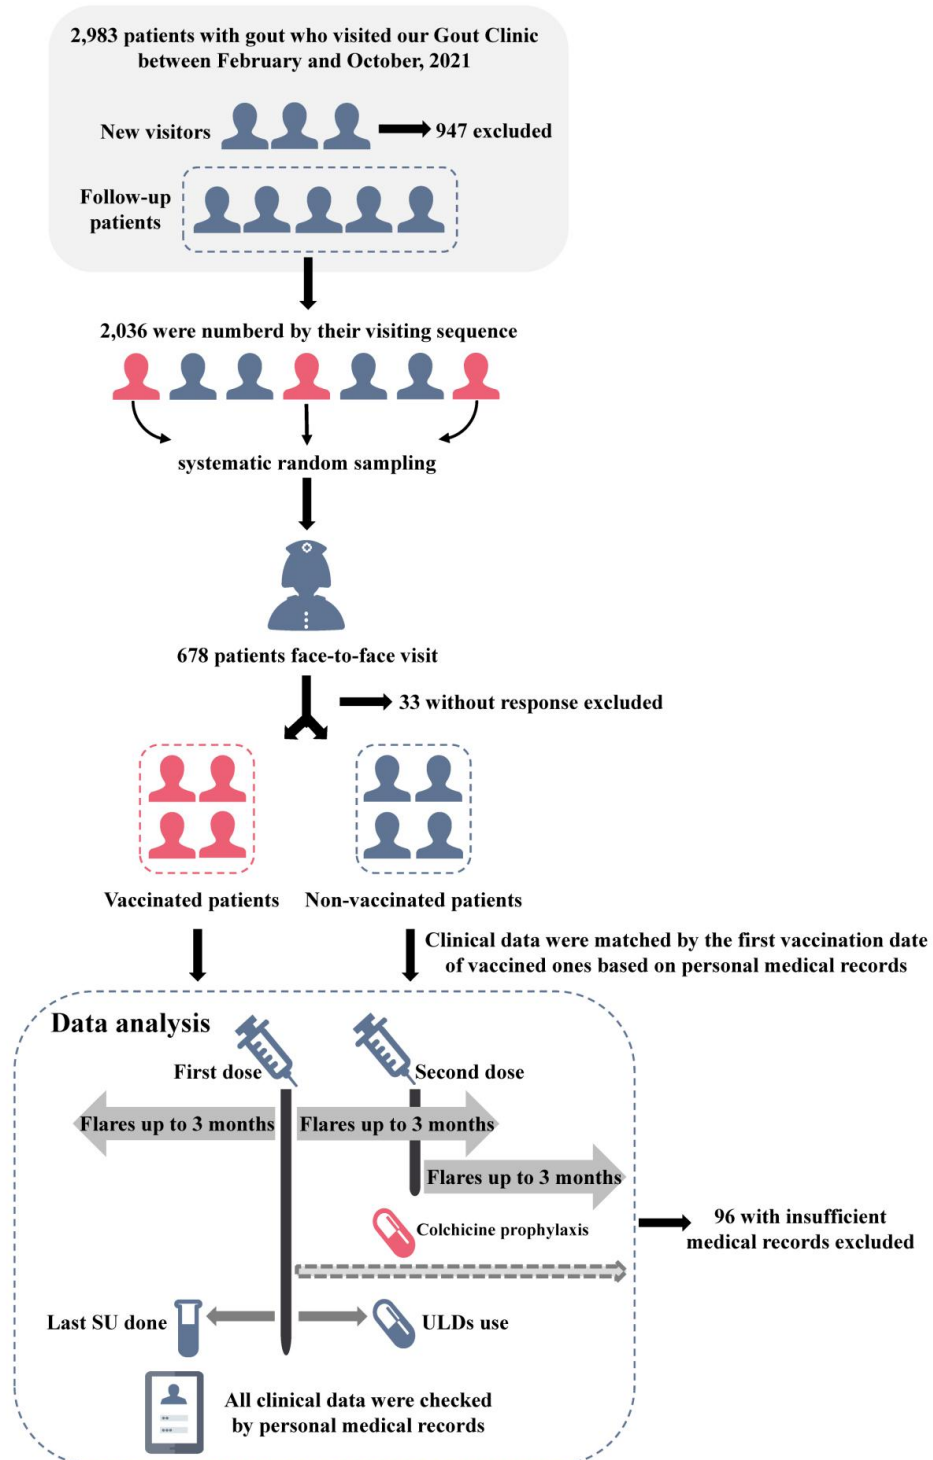

Supplement: annrheumdis-2022-222199supp001.pdf [file annrheumdis-2022-222199supp001.pdf]
